# Supplementary material for: Analysis of Serum microRNA Expression Profiles and Comparison with Small Intestinal microRNA Expression Profiles in Weaned Piglets
Source: PLoS One. 2016 Sep 15;11(9):e0162776. doi: 10.1371/journal.pone.0162776 (PMC5025173; doi:10.1371/journal.pone.0162776)
Supplement: S3 Table — *The universal reverse primer. # Also as the reverse primer of U6 snRNA. (DOCX) [file pone.0162776.s003.docx]

**S3 Table. Primer sequences used in RT-qPCR.**

| miRNA ID | Primer | Sequences(5'-3’) |
| --- | --- | --- |
| ssc-miR-21 | RT | GTCGTATCCAGTGCAGGGTCCGAGGTGCACTGGATACGACTCAACAT |
| FW | TGCGGTAGCTTATCAGACTGATGTT |
| ssc-miR-31 | RT | GTCGTATCCAGTGCAGGGTCCGAGGTGCACTGGATACGACCAGCTAT |
| FW | TGCGGAGGCAAGATGCTGGCATAGC |
| ssc-miR-205 | RT | GTCGTATCCAGTGCAGGGTCCGAGGTGCACTGGATACGACCAGACTC |
| FW | TGCGGTCCTTCATTCCACCGGAGTC |
| ssc-miR-194b | RT | GTCGTATCCAGTGCAGGGTCCGAGGTGCACTGGATACGACTCCACAT |
| FW | TGCGGTGTAACAGCGACTCCATGTG |
| ssc-miR-150 | RT | GTCGTATCCAGTGCAGGGTCCGAGGTGCACTGGATACGACCACTGGT |
| FW | TGCGGTCTCCCAACCCTTGTACCAG |
| ssc-miR-146b | RT | GTCGTATCCAGTGCAGGGTCCGAGGTGCACTGGATACGACGCCTATG |
| FW | TGCGGTGAGAACTGAATTCCATAG |
| ssc-miR-144 | RT | GTCGTATCCAGTGCAGGGTCCGAGGTGCACTGGATACGACGTACATC |
| FW | TGCGGTACAGTATAGATGATGATGT |
| ssc-miR-30c-5p | RT | GTCGTATCCAGTGCAGGGTCCGAGGTGCACTGGATACGACGCTGAGA |
| FW | TGCGGTGTAAACATCCTACACTCTCA |
| ssc-miR-363 | RT | GTCGTATCCAGTGCAGGGTCCGAGGTGCACTGGATACGACTTACAGA |
| FW | TGCGGAATTGCACGGTATCCATCTGT |
| ssc-miR-186 | RT | GTCGTATCCAGTGCAGGGTCCGAGGTGCACTGGATACGACAAGCCCT |
| FW | TGCGGCAAAGAATTCTCCTTTTGGGC |
| ssc-miR-194a | RT | GTCGTATCCAGTGCAGGGTCCGAGGTGCACTGGATACGACCCACATG |
| FW | TGCGGTGTAACAGCAACTCCATGT |
| ssc-miR-215 | RT | GTCGTATCCAGTGCAGGGTCCGAGGTGCACTGGATACGACGTCTGTC |
| FW | TGCGGATGACCTATGAATTGACAG |
| ssc-miR-486 | RT | GTCGTATCCAGTGCAGGGTCCGAGGTGCACTGGATACGACCTCGGGG |
| FW | TGCGGTCCTGTACTGAGCTGCCCCG |
| ssc-miR-185 | RT | GTCGTATCCAGTGCAGGGTCCGAGGTGCACTGGATACGACTCAGGAA |
| FW | TGCGGTGGAGAGAAAGGCAGTTCCT |
|  | URP* | CAGTGCAGGGTCCGAGGT |
| U6 snRNA | RT# | GCTTCGGCAGCACATATACTAAAAT |
| FW | CGCTTCACGAATTTGCGTGTCAT |

RT: Reverse transcription primer; FW: Forward primer.

* The universal reverse primer.

# Also as the reverse primer of U6 snRNA.
